# Supplementary material for: Very Late Recurrence in Germ Cell Tumor of the Testis: Lessons and Implications
Source: MDPI journal article supplement (doi:10.3390/cancers14051127), 2022-02-23
Supplement: s1 [file s1]

**Table S1.** Patient Characteristics at Initial Presentation and at Late Relapse.

| Pt | Age at Dx | Stage | Primary pathology | Elevated AFP at Dx | Elevated HCG at Dx | Initial Treatment (pathology if resection) | Time to relapse, years | Site of recurrence              | Treatment at Relapse                                                | Pathology of recurrence | Disease status (months from relapse) | Elevated AFP at LR | Elevated HCG at LR |
|----|-----------|-------|-------------------|--------------------|--------------------|--------------------------------------------|------------------------|---------------------------------|---------------------------------------------------------------------|-------------------------|--------------------------------------|--------------------|--------------------|
| 1  | 36.4      | IIIC  | C + E + T + Y     | NA                 | Yes                | BEP                                        | 18.3                   | Bone, MN, RPLN                  | XRT                                                                 | ST-C                    | D (69)                               | Yes                | No                 |
| 2  | 25.9      | IIA   | E + T + Y         | NA                 | Yes                | EP                                         | 9.3                    | Bone, CNS, Lungs, RPLN          | VIP Thoracotomy                                                     | C                       | A <sup>+</sup> (28)                  | Yes                | Yes                |
| 3  | 45.4      | IS    | E + S + T         | Yes                | Yes                | CEB                                        | 16.1                   | Colon, RPLN                     | FOLFOX, TIP HDC-SCT                                                 | E + Y + ST-C            | D (40)                               | Yes                | Yes                |
| 4  | 22.4      | IIIA  | E + T + Y         | NA                 | NA                 | BEP                                        | 13.3                   | CNS, MN, RPLN                   | VIP HDC-SCT                                                         | Y                       | D (10)                               | Yes                | Yes                |
| 5  | 29.4      | IA    | S + T             | NA                 | NA                 | XRT                                        | 8.1                    | RPLN                            | RPLND                                                               | ST-C + T                | A <sup>0</sup> (7)                   | No                 | No                 |
| 6  | 25.6      | IIIB  | C + E + T + Y     | Yes                | Yes                | BEP, EP RPLND (T) Lung/NN resection (T)    | 13.6                   | Pleura                          | CAV + IE                                                            | ST-S                    | D (16)                               | No                 | No                 |
| 7  | 15.9      | I     | NA                | NA                 | NA                 | BEP RPLND (E + T) VIP, TIP                 | 13.8                   | Lung, MN, pleura                | Surgery TIP x4                                                      | E + T + Y               | A <sup>0</sup> (101)                 | Yes                | No                 |
| 8  | 32.2      | II    | T                 | NA                 | NA                 | BEP, EP RPLND (NVT)                        | 26.8                   | NN, RPLN                        | EP x4 RPLND                                                         | ST-C                    | A <sup>+</sup> (6)                   | Yes                | No                 |
| 9  | 39.7      | IIIC  | NA                | NA                 | NA                 | BEP XRT                                    | 9.9                    | Bone, ILN, MN, skin             | TIP RPLND HDC-SCT XRT                                               | ST-C                    | A <sup>0</sup> (124)                 | NA                 | NA                 |
| 10 | 19.3      | IIIA  | E + T + Y         | Yes                | Yes                | BEP                                        | 21.8                   | Lung, RPLN                      | TIP                                                                 | T                       | A <sup>+</sup> (9)                   | Yes                | No                 |
| 11 | 17.3      | IIIA  | E + Y (RPLN)      | NA                 | NA                 | BEP                                        | 25.3                   | Lungs, RPLN                     | VeIP                                                                | E + Y                   | A <sup>0</sup> (51)                  | Yes                | No                 |
| 12 | 30.9      | IA    | E + S + Y         | No                 | No                 | Surveillance                               | 6.8                    | RPLN                            | EP RPLND                                                            | ST-S                    | A <sup>0</sup> (158)                 | No                 | No                 |
| 13 | 24.6      | II    | NA                | NA                 | NA                 | BEP                                        | 27.3                   | RPLN                            | RPLND TIP, ACE                                                      | Y                       | D (34)                               | Yes                | No                 |
| 14 | 34.9      | IIIC  | T + Y             | Yes                | Yes                | BEP, VIP, TIP, ACE RPLND (T)               | 15.9                   | Mesentery, pelvis, psoas muscle | Pelvic and mesenteric resection                                     | T                       | A <sup>0</sup> (14)                  | No                 | No                 |
| 15 | 20.7      | IIIA  | NA                | NA                 | NA                 | BEP                                        | 14.8                   | MN, RPLN                        | EP, ATP, TIP, GTA                                                   | Y                       | D (7)                                | Yes                | No                 |
| 16 | 36.9      | IIIA  | NA                | NA                 | Yes                | BEP                                        | 14.4                   | Bone, ILN, lung                 | TIP, ATP XRT                                                        | C + E + T               | D (17)                               | No                 | Yes                |
| 17 | 17.3      | IIIB  | E                 | NA                 | Yes                | VeIP RPLND (NVT)                           | 30.2                   | Bone, liver, lung, RPLN         | BEP, TIP FOLFOX                                                     | Y                       | A <sup>+</sup> (6)                   | Yes                | No                 |
| 18 | 25.6      | IIIB  | E                 | Yes                | Yes                | BEP, EP, POMB, ACE RPLND (NVT)             | 17.0                   | Liver, LN                       | ATP, TIP Temsirolimus HDC-SCT Vandetinib Lenalidomide + Bevacizumab | Y                       | D (36)                               | Yes                | Yes                |
| 19 | 30.2      | II    | E + T + Y         | Yes                | Yes                | XRT                                        | 30.5                   | RPLN                            | RPLND                                                               | Y + ST-C                | A <sup>+</sup> (6)                   | No                 | No                 |
| 20 | 24.4      | IS    | Y                 | NA                 | NA                 | BEP                                        | 8.8                    | Brain, liver, bone, lungs       | TIP WBRT HDC-SCT Cabozantinib + Nivolumab GemOx                     | NA                      | A <sup>+</sup> (42)                  | NA                 | Yes                |
| 21 | 23.8      | II    | NA                | NA                 | NA                 | Chemo (regimen NA)                         | 22.7                   | Duodenum, RPLN                  | XRT FOLFOX RPLND                                                    | ST-C                    | A <sup>0</sup> (12)                  | No                 | No                 |

|    |      |      |                  |     |     |                                             |      |            |                              |          |                     |     |     |
|----|------|------|------------------|-----|-----|---------------------------------------------|------|------------|------------------------------|----------|---------------------|-----|-----|
| 22 | 23.1 | IIIA | NA               | NA  | NA  | BEP<br>Lobectomy<br>(path NA)               | 32.7 | RPLN       | RPLND                        | ST-C     | A <sup>0</sup> (23) | No  | No  |
| 23 | 34.9 | II   | T                | Yes | Yes | BEP, VIP<br>RPLND (T)<br>NND (T)<br>MND (T) | 21.4 | MN         | GTA<br>Thoracotomy +<br>MLND | T + ST-C | A <sup>0</sup> (22) | Yes | Yes |
| 24 | 32.6 | IIIC | C + E + T +<br>Y | Yes | Yes | BOP, POMB,<br>ACE<br>Lobectomy (T +<br>Y)   | 14.5 | Lung, bone | Pneumonec-<br>tomy + MLND    | Y        | A <sup>0</sup> (55) | Yes | No  |
| 25 | 33.6 | IA   | E + Y            | NA  | NA  | Surveillance                                | 25.3 | NN, RPLN   | EP                           | E        | D (6)               | No  | Yes |

Pt: patient; Dx: diagnosis; C: choriocarcinoma; E: embryonal carcinoma; T: teratoma; Y: yolk sac tumor; S: seminoma; NA: not available; RPLN: retroperitoneal lymph node; BEP: bleomycin, etoposide, cisplatin; EP: etoposide, cisplatin; CEB: carboplatin, etoposide, bleomycin; XRT: radiation therapy; RPLND: retroperitoneal lymph node dissection; VIP: etoposide, ifosfamide, cisplatin; TIP: paclitaxel, ifosfamide, cisplatin; NVT: no viable disease; ACE: actinomycin, cyclophosphamide, etoposide; VeIP: vinblastine, ifosfamide, cisplatin; POMB: cisplatin, vincristine, methotrexate, bleomycin; NN: neck node dissection; MN: mediastinal node dissection; BOP: bleomycin, vincristine, cisplatin; MN: mediastinal node; CNS: central nervous system; NN: neck node; ILN: inguinal node; FOLFOX: 5-fluorouracil, oxaliplatin; HDC-SCT: high-dose chemotherapy with stem cell transplant; CAV: cyclophosphamide, doxorubicin, vincristine; IE: ifosfamide, etoposide; ATP: doxorubicin, paclitaxel, cisplatin; GTA: gemcitabine, paclitaxel, doxorubicin; WBRT: whole brain radiation therapy; GemOx: gemcitabine, oxaliplatin; ST-C: somatic transformation to carcinoma; ST-S: somatic transformation to sarcoma; A<sup>+</sup>: alive with disease, A<sup>0</sup>: alive with no evidence of disease, D: dead.
